# Supplementary material for: Dietary supplementation of Ferula badrakema and sodium saccharin: Effects on the growth performance, blood metabolites, immune response, antioxidant status, and gut histomorphology in broiler chicks
Source: Research Square preprint supplement (doi:10.21203/rs.3.rs-7871471/v1), 2025-12-15
Supplement: Supplementary file 1 [file d27eb98475a9dade0b2924ba.docx]

| **Table 1.** Ingredients and nutrient composition of experimental diets (*as-fed basis*, %). | | | |
| --- | --- | --- | --- |
| Ingredient (%) | 1-10 d | 11-24 d | 25-42 d |
| Corn | 35.63 | 29.84 | 25.63 |
| Wheat | 10.00 | 20.00 | 30.00 |
| Soybean meal (44% CP) | 41.67 | 37.22 | 30.88 |
| Soybean oil | 6.73 | 7.49 | 8.29 |
| Limestone | 1.34 | 1.2 | 1.19 |
| Dicalcium phosphate | 1.50 | 1.3 | 1.11 |
| Common salt | 0.3 | 0.29 | 0.29 |
| Mineral premix a | 0.25 | 0.25 | 0.25 |
| Vitamin premix b | 0.25 | 0.25 | 0.25 |
| DL-methionine | 0.4 | 0.35 | 0.32 |
| L-lysine HCl | 0.26 | 0.17 | 0.17 |
| L-threonine | 0.07 | 0.04 | 0.02 |
| Sodium bicarbonate | 0.10 | 0.10 | 0.10 |
| Cellulose | 1.50 | 1.50 | 1.50 |
| Calculated chemical composition | | | |
| Metabolizable energy (kcal/kg) | 3000 | 3100 | 3200 |
| Crude protein (%) | 23.0 | 21.50 | 19.50 |
| Calcium (%) | 0.96 | 0.87 | 0.79 |
| Available phosphorus (%) | 0.48 | 0.435 | 0.39 |
| Lysine (%) | 1.44 | 1.29 | 1.16 |
| Methionine (%) | 0.61 | 0.58 | 0.54 |
| Met + Cys (%) | 1.08 | 0.99 | 0.91 |
| Threonine (%) | 0.97 | 0.88 | 0.78 |
| a Provided per kilogram of diet: Vitamin A, 12500 IU; vitamin D3, 5000 IU; vitamin E, 80 IU; vitamin K3, 3.2 mg; vitamin B12, 0.02 mg; thiamin, 3.2‌ mg; riboflavin, 8.6 mg; niacin, 62.5 mg; folic acid, 2.2 mg; biotin, 0.25 mg; pyridoxine, 4.9 mg; pantothenic acid, 18.5 mg; antioxidant, 2.5 mg.  b Provided per kilogram of diet: Zn, 110 mg; Mn, 120 mg; Se, 0.30 mg; I, 1.25 mg; Cu, 16 mg; Fe, 20.2 mg. | | | |

| **Table 2.** The effect of dietary supplementation with *Ferula badrakema* root powder (FB), with or without the sodium saccharin (SAC) sweetener, on the growth performance of broiler chicks. | | | | | | | | | | | | | | | |
| --- | --- | --- | --- | --- | --- | --- | --- | --- | --- | --- | --- | --- | --- | --- | --- |
| Treatments, % in diet | | Feed intake (g/bird/d) | | | |  | Body weight gain (g/bird/d) | | | |  | Feed conversion ratio (g/g) | | | |
| 1-10 d | 11-24 d | 25-42 d | 1-42 d |  | 1-10 d | 11-24 d | 25-42 d | 1-42 d |  | 1-10 d | 11-24 d | 25-42 d | 1-42 d |
| SAC | 0 | 20.90b | 65.09 | 153.77 | 91.23b |  | 19.21b | 45.48 | 73.16b | 51.38b |  | 1.09 | 1.43 | 2.15 | 1.77 |
| 0.15 | 21.50a | 66.55 | 159.33 | 94.46a |  | 19.61a | 46.46 | 76.64a | 54.58a |  | 1.10 | 1.43 | 2.09 | 1.73 |
| SEM | | 0.19 | 1.09 | 1.55 | 0.63 |  | 0.12 | 0.54 | 1.34 | 0.32 |  | 0.01 | 0.03 | 0.03 | 0.01 |
| *P*-value |  | 0.03 | 0.35 | 0.02 | 0.01 |  | 0.02 | 0.21 | 0.01 | <.0001 |  | 0.56 | 0.98 | 0.25 | 0.06 |
| FB | 0 | 21.27 | 66.33 | 156.6 | 92.01 |  | 19.36 | 45.90 | 71.82 | 52.14 |  | 1.10 | 1.45 | 2.19 | 1.78 |
| 0.75 | 21.05 | 65.66 | 155.6 | 92.92 |  | 19.45 | 46.18 | 74.59 | 53.44 |  | 1.08 | 1.42 | 2.10 | 1.72 |
|  | 1.5 | 21.29 | 65.47 | 157.5 | 93.61 |  | 19.41 | 45.83 | 75.97 | 53.36 |  | 1.10 | 1.43 | 2.08 | 1.75 |
| SEM | | 0.23 | 1.33 | 1.90 | 0.77 |  | 0.14 | 0.66 | 1.64 | 0.40 |  | 0.02 | 0.04 | 0.04 | 0.02 |
| *P*-value |  | 0.71 | 0.89 | 0.79 | 0.35 |  | 0.91 | 0.92 | 0.21 | 0.05 |  | 0.62 | 0.81 | 0.18 | 0.09 |
| SAC | FB | Interaction effects | | | | | | | | | | | | | |
| 0 | 0 | 21.29 | 65.30 | 157.0ab | 92.82ab |  | 19.32 | 45.94 | 71.82 | 51.17b |  | 1.10 | 1.43 | 2.20 | 1.81a |
| 0 | 0.75 | 20.73 | 65.24 | 153.4ab | 90.75b |  | 19.29 | 45.51 | 71.53 | 51.71b |  | 1.07 | 1.44 | 2.15 | 1.75ab |
| 0 | 1.5 | 20.69 | 64.73 | 150.0b | 90.14b |  | 19.02 | 44.98 | 71.48 | 51.25b |  | 1.09 | 1.44 | 2.11 | 1.76ab |
| 0.15 | 0 | 21.23 | 67.37 | 156.1ab | 93.02ab |  | 19.41 | 45.85 | 71.82 | 53.11ab |  | 1.09 | 1.47 | 2.19 | 1.75ab |
| 0.15 | 0.75 | 21.37 | 65.69 | 157.9ab | 93.27ab |  | 19.61 | 46.86 | 77.64 | 55.16a |  | 1.10 | 1.40 | 2.05 | 1.69b |
| 0.15 | 1.5 | 21.89 | 66.59 | 164.1a | 97.09a |  | 19.80 | 46.67 | 80.46 | 55.48a |  | 1.11 | 1.42 | 2.04 | 1.75ab |
| SEM | | 0.33 | 1.88 | 2.69 | 1.10 |  | 0.20 | 0.94 | 2.33 | 0.56 |  | 0.02 | 0.05 | 0.06 | 0.03 |
| *P*-value | | 0.18 | 0.90 | 0.04 | 0.01 |  | 0.24 | 0.61 | 0.16 | 0.01 |  | 0.72 | 0.69 | 0.70 | 0.53 |
| Contrast | FB0 vs FB0.75 and FB1.5 | | | | | | | | | | | | | | |
| *P*-value | | 0.11 | 0.30 | 0.20 | 0.21 |  | 0.10 | 0.56 | 0.60 | 0.10 |  | 0.0006 | 0.57 | 0.20 | 0.35 |
| a-b Means with different letters within a column are significantly different (P < 0.05). | | | | | | | | | | | | | | | |

| **Table 3.**  The effect of dietary supplementation with *Ferula badrakema* root powder (FB), with or without sodium saccharin (SAC) sweetener, on the edible carcass and internal organ weights (as a percentage of live body weight) in broiler chicks at 42 days of age. | | | | | | | | | |
| --- | --- | --- | --- | --- | --- | --- | --- | --- | --- |
| Treatments, % in diet | | Heart | Liver | Small intestine | Gizzard | Abdominal fat | Thighs | Breast | Edible carcass |
| SAC | 0 | 0.43 | 2.29 | 3.16 | 1.34 | 1.27 | 20.07 | 25.01 | 65.65 |
| 0.15 | 0.40 | 2.30 | 3.25 | 1.35 | 1.34 | 20.28 | 25.26 | 65.60 |
| SEM | | 0.02 | 0.08 | 0.09 | 0.04 | 0.09 | 0.38 | 0.51 | 0.71 |
| *P*-value |  | 0.17 | 0.98 | 0.49 | 0.87 | 0.57 | 0.71 | 0.73 | 0.96 |
| FB | 0 | 0.41 | 2.18 | 3.24 | 1.35 | 1.33 | 19.95 | 26.09 | 66.06 |
|  | 0.75 | 0.41 | 2.29 | 3.24 | 1.41 | 1.20 | 19.95 | 24.57 | 65.25 |
|  | 1.5 | 0.42 | 2.41 | 3.15 | 1.27 | 1.39 | 20.63 | 24.74 | 65.57 |
| SEM | | 0.02 | 0.09 | 0.11 | 0.05 | 0.11 | 0.47 | 0.62 | 0.87 |
| *P*-value |  | 0.92 | 0.25 | 0.79 | 0.20 | 0.44 | 0.50 | 0.18 | 0.80 |
| SAC | FB | Interaction effects | | | | | | | |
| 0 | 0 | 0.41 | 2.11 | 3.16 | 1.38 | 1.42 | 20.13 | 25.22 | 65.40 |
| 0 | 0.75 | 0.45 | 2.32 | 3.30 | 1.44 | 1.02 | 20.04 | 24.46 | 65.93 |
| 0 | 1.5 | 0.43 | 2.45 | 3.03 | 1.18 | 1.37 | 20.05 | 25.35 | 65.61 |
| 0.15 | 0 | 0.41 | 2.25 | 3.31 | 1.32 | 1.25 | 19.77 | 26.97 | 66.71 |
| 0.15 | 0.75 | 0.37 | 2.26 | 3.18 | 1.36 | 1.37 | 19.85 | 24.68 | 64.57 |
| 0.15 | 1.5 | 0.41 | 2.37 | 3.27 | 1.35 | 1.41 | 21.21 | 24.14 | 65.52 |
| SEM | | 0.01 | 0.05 | 0.06 | 0.03 | 0.06 | 0.27 | 0.36 | 0.50 |
| *P*-value |  | 0.42 | 0.66 | 0.49 | 0.18 | 0.25 | 0.46 | 0.26 | 0.56 |
| Contrast | FB0 vs FB0.75 and FB1.5 | | | | | | | | |
| *P*-value |  | 0.34 | 0.10 | 0.99 | 0.54 | 0.33 | 0.84 | 0.65 | 0.67 |

| **Table 4.** The effect of dietary supplementation with *Ferula badrakema* root powder (FB), with or without sodium saccharin (SAC) sweetener, on the blood serum metabolites in broiler chicks at 42 days of age. | | | | | | | | | | | | |
| --- | --- | --- | --- | --- | --- | --- | --- | --- | --- | --- | --- | --- |
| Treatments, % in diet | | Uric acid (mg/dl) | | Albumin (g/dl) | Total protein (g/dl) | Cholesterol  (mg/dl) | HDL-C(mg/dl) | LDL-C(mg/dl) | Triglycerides (mg/dl) | Glucose (mg/dl) | Calcium (mg/dl) | Phosphorus (mg/dl) |
| SAC | 0 | 3.88b | | 1.35 | 3.44 | 117.3 | 46.78 | 87.21 | 77.72 | 117.3 | 8.43 | 6.72 |
|  | 0.15 | 4.49a | | 1.40 | 3.32 | 122.9 | 47.83 | 93.84 | 75.89 | 122.9 | 9.01 | 6.95 |
| SEM |  | 0.15 | | 0.03 | 0.05 | 3.69 | 1.67 | 2.52 | 3.19 | 5.54 | 0.30 | 0.20 |
| *P*-value |  | 0.007 | | 0.27 | 0.09 | 0.71 | 0.66 | 0.07 | 0.69 | 0.48 | 0.18 | 0.41 |
| FB | 0 | 3.63b | | 1.32b | 3.32 | 123.5a | 48.08 | 93.53 | 93.17a | 126.7 | 8.85 | 6.42b |
|  | 0.75 | 4.27a | | 1.36ab | 3.35 | 99.2b | 45.58 | 87.55 | 64.08b | 118.5 | 8.37 | 6.57b |
|  | 1.5 | 4.66a | | 1.46a | 3.47 | 114.3ab | 48.25 | 89.50 | 73.17b | 115.2 | 8.93 | 7.52a |
| SEM | | 0.18 | | 0.04 | 0.06 | 4.52 | 2.04 | 3.09 | 3.91 | 6.78 | 0.37 | 0.24 |
| *P*-value |  | 0.001 | | 0.02 | 0.14 | 0.003 | 0.59 | 0.27 | <.0001 | 0.48 | 0.527 | 0.006 |
| SAC | FB |  | Interaction effects | | | | | | | | | |
| 0 | 0 | 2.75b | | 1.30 | 3.38 | 123.8 | 45.67 | 87.39 | 95.33a | 129.5 | 8.45 | 6.53 |
| 0 | 0.75 | 2.75b | | 1.37 | 3.43 | 99.5 | 45.5 | 87.89 | 57.33c | 107.2 | 8.13 | 7.66 |
| 0 | 1.5 | 4.29a | | 1.40 | 3.50 | 116.5 | 49.17 | 86.36 | 80.50abc | 115.2 | 8.7 | 7.38 |
| 0.15 | 0 | 4.52a | | 1.33 | 3.25 | 123.2 | 50.5 | 101.67 | 91.00ab | 123.8 | 9.25 | 7.15 |
| 0.15 | 0.75 | 3.94a | | 1.35 | 3.27 | 98.8 | 45.67 | 87.21 | 70.83bc | 129.8 | 8.62 | 6.03 |
| 0.15 | 1.5 | 5.02a | | 1.52 | 3.45 | 112.0 | 47.33 | 92.64 | 65.83b | 115.2 | 9.17 | 6.25 |
| SEM | | 0.10 | | 0.02 | 0.03 | 2.61 | 1.18 | 4.37 | 2.26 | 3.92 | 0.21 | 0.14 |
| *P*-value |  | 0.0002 | | 0.40 | 0.77 | 0.94 | 0.50 | 0.25 | 0.05 | 0.31 | 0.94 | 0.77 |
| Contrast |  | FB0 vs FB0.75 and FB1.5 | | | | | | | | | | |
| *P*-value |  | <.0001 | | 0.10 | 0.32 | 0.02 | 0.66 | 0.45 | 0.0003 | 0.11 | 0.96 | 0.01 |
| a-b Means with different letters within a column are significantly different (P < 0.05).  HDL-C, High-density lipoprotein cholesterol. | | | | | | | | | | | | |

| **Table 5.** The effect of dietary supplementation with *Ferula badrakema* root powder (FB), with or without sodium saccharin (SAC) sweetener, on the humoral immune response (log2) in broiler chicks at 42 days of age. | | | | | | | | | |
| --- | --- | --- | --- | --- | --- | --- | --- | --- | --- |
| Treatments, % in diet | | |  | 35 d |  |  |  | 42 d |  |
| IgT | IgG | IgM |  | IgT | IgG | IgM |
| SAC | | 0 | 1.83 | 4.22 | 2.39 |  | 1.05b | 2.17 | 1.11 |
|  | | 0.15 | 2.28 | 4.61 | 2.33 |  | 1.50a | 2.50 | 1.00 |
| SEM | | | 0.17 | 0.29 | 0.28 |  | 0.10 | 0.17 | 0.15 |
| *P*-value | |  | 0.07 | 0.36 | 0.89 |  | 0.004 | 0.18 | 0.60 |
| FB | | 0 | 1.58b | 3.42b | 1.83 |  | 1.25 | 1.91b | 0.67b |
|  | | 0.75 | 2.17ab | 4.75a | 2.58 |  | 1.25 | 2.50ab | 1.00ab |
|  | | 1.5 | 2.42a | 5.08a | 2.67 |  | 1.33 | 2.83a | 1.50a |
| SEM | | | 0.21 | 0.36 | 0.34 |  | 0.12 | 0.21 | 0.18 |
| *P*-value | |  | 0.02 | 0.01 | 0.19 |  | 0.86 | 0.01 | 0.01 |
| SAC | | FB | Interaction effects | | | | | | |
| 0 | | 0 | 1.33 | 2.83 | 1.50 |  | 1.00 | 1.50 | 0.50 |
| 0 | | 0.75 | 2.00 | 4.50 | 2.50 |  | 1.00 | 2.00 | 1.00 |
| 0 | | 1.5 | 2.17 | 5.33 | 3.17 |  | 1.17 | 3.00 | 1.83 |
| 0.15 | | 0 | 1.83 | 4.00 | 2.17 |  | 1.50 | 2.33 | 0.83 |
| 0.15 | | 0.75 | 2.33 | 5.00 | 2.67 |  | 1.50 | 2.50 | 1.00 |
| 0.15 | | 1.5 | 2.66 | 4.83 | 2.17 |  | 1.50 | 2.67 | 1.17 |
| SEM | | | 0.12 | 0.51 | 0.49 |  | 0.17 | 0.30 | 0.26 |
| *P*-value | | | 0.95 | 0.27 | 0.23 |  | 0.86 | 0.14 | 0.16 |
| Contrast | FB0 vs FB0.75 and FB1.5 | | | | | | | | |
| *P*-value | | | 0.76 | 0.49 | 1.00 |  | 0.01 | 0.13 | 0.17 |
| a-b Means with different letters within a column are significantly different (P < 0.05).  IgT, Total Immunoglobulins; IgG, Immunoglobulin G; IgM, Immunoglobulin M. | | | | | | | | | |

| **Table 6.** The effect of dietary supplementation with *Ferula badrakema* root powder (FB), with or without sodium saccharin (SAC) sweetener, on the oxidative stress parameters in the blood serum in broiler chicks at 42 days of age. | | | | | |
| --- | --- | --- | --- | --- | --- |
| Treatments, % in diet | | AST (IU/L) | ALT (IU/L) | MDA (nMol/L) | TAC (nMol/L) |
| SAC | 0 | 306.6 | 31.83 | 1.71 | 1.15 |
| 0.15 | 311.1 | 32.28 | 1.68 | 1.26 |
| SEM |  | 8.75 | 1.43 | 0.12 | 0.08 |
| *P*-value |  | 0.72 | 0.83 | 0.87 | 0.31 |
| FB | 0 | 319.7 | 32.23 | 2.14a | 1.28 |
| 0.75 | 290.7 | 29.66 | 1.50b | 1.02 |
| 1.5 | 316.3 | 34.17 | 1.45b | 1.32 |
| SEM |  | 10.72 | 1.75 | 0.15 | 0.10 |
| *P*-value |  | 0.13 | 0.20 | 0.003 | 0.08 |
| SAC | FB | Interaction effects | | | |
| 0 | 0 | 332.7 | 34.17 | 2.45 | 1.33 |
| 0 | 0.75 | 276.2 | 28.16 | 1.37 | 0.93 |
| 0 | 1.5 | 311.0 | 33.18 | 1.32 | 1.18 |
| 0.15 | 0 | 302.7 | 30.50 | 1.83 | 1.22 |
| 0.15 | 0.75 | 305.2 | 31.17 | 1.63 | 1.11 |
| 0.15 | 1.5 | 321.5 | 35.23 | 1.58 | 1.46 |
| SEM |  | 15.15 | 2.48 | 0.21 | 0.14 |
| *P*-value |  | 0.20 | 0.36 | 0.06 | 0.36 |
| Contrast | FB0 vs FB0.75 and FB1.5 | | | | |
| *P*-value |  | 0.02 | 0.19 | 0.11 | 0.20 |
| a-b Means with different letters within a column are significantly different (P < 0.05).  AST, Aspartate aminotransferase; ALT, Alanine aminotransferase; MDA, malondialdehyde; TAC, Total antioxidant capacity. | | | | | |

| **Table 7.**  The effect of dietary supplementation with *Ferula badrakema* root powder (FB), with or without sodium saccharin (SAC) sweetener, on the oxidative stress parameters (unit/mg protein) in the liver tissue of broiler chicks at 42 days of age. | | | | | |
| --- | --- | --- | --- | --- | --- |
| Treatments, % in diet | | SOD (IU/mg) | GSH-Px (IU/mg) | MDA (nmol/mg) | TAC (nmol/mg) |
| SAC | 0 | 31.75 | 19.13 | 0.76 | 1.66 |
| 0.15 | 31.58 | 19.14 | 0.80 | 1.87 |
| SEM |  | 0.052 | 0.33 | 0.02 | 0.10 |
| *P*-value |  | 0.82 | 0.99 | 0.30 | 0.15 |
| FB | 0 | 28.84b | 18.69 | 0.95a | 1.33b |
| 0.75 | 32.19a | 19.16 | 0.75b | 1.79a |
| 1.5 | 33.97a | 19.56 | 0.65b | 2.17a |
| SEM |  | 0.64 | 0.41 | 0.03 | 0.13 |
| *P*-value |  | 0.0001 | 0.33 | 0.0001 | 0.0001 |
| SAC | FB | Interaction effects | | | |
| 0 | 0 | 28.72 | 18.50 | 0.97 | 1.24 |
| 0 | 0.75 | 32.44 | 19.11 | 0.68 | 1.55 |
| 0 | 1.5 | 34.09 | 19.78 | 0.64 | 2.18 |
| 0.15 | 0 | 28.95 | 18.88 | 0.93 | 1.41 |
| 0.15 | 0.75 | 31.95 | 19.20 | 0.81 | 2.04 |
| 0.15 | 1.5 | 33.85 | 19.34 | 0.66 | 2.17 |
| SEM |  | 0.90 | 0.57 | 0.04 | 0.18 |
| *P*-value |  | 0.77 | 0.76 | 0.14 | 0.39 |
| Contrast | FB0 vs FB0.75 and FB1.5 | | | | |
| *P*-value |  | 0.004 | 0.06 | 0.0001 | 0.001 |
| a-b Means with different letters within a column are significantly different (P < 0.05).  SOD, Superoxide dismutase; GSH-Px, Glutathione peroxidase; MDA, Malondialdehyde, TAC, Total antioxidant capacity. | | | | | |

| **Table 8.** The effect of dietary supplementation with *Ferula badrakema* root powder (FB), with or without sodium saccharin (SAC) sweetener, on the histomorphology indices of jejunum in small intestine of broiler chicks at 42 days of age. | | | | | | | |
| --- | --- | --- | --- | --- | --- | --- | --- |
| Treatments | (%) | Villus height (μm) | Villus width (μm) | Crypt depth (μm) | Villus height/width ratio | Villus height/ crypt depth ratio | Villus surface area (μm2×103) |
| SAC | 0 | 1287.9 b | 188.5 | 188.5 | 6.17 | 7.19 | 1.02 |
|  | 0.15 | 1451.6 a | 211.4 | 218.1 | 7.25 | 7.09 | 1.03 |
| SEM |  | 42.46 | 10.68 | 13.07 | 0.37 | 0.43 | 0.05 |
| *P*-value |  | 0.01 | 0.86 | 0.120 | 0.049 | 0.88 | 0.88 |
| FB | 0 | 1186.8b | 201.9 | 218.6 | 6.18 | 5.58b | 0.93b |
|  | 0.75 | 1447.0a | 196.5 | 200.5 | 7.55 | 7.54ab | 0.97ab |
|  | 1.5 | 1475.4a | 240.3 | 190.8 | 6.39 | 8.04a | 1.18a |
| SEM |  | 52.00 | 13.08 | 16.00 | 0.46 | 0.53 | 0.06 |
| *P*-value |  | 0.001 | 0.05 | 0.468 | 0.088 | 0.02 | 0.022 |
| SAC | FB | Interaction effects | | | | | |
| 0 | 0 | 1066.4 | 208.8 | 205.4 | 5.18 | 5.31 | 0.94 |
| 0 | 0.75 | 1370.6 | 199.8 | 188.2 | 5.17 | 7.56 | 0.98 |
| 0 | 1.5 | 1424.6 | 234.3 | 171.8 | 6.20 | 8.69 | 1.14 |
| 0.15 | 0 | 1307.2 | 195.1 | 231.8 | 7.19 | 6.39 | 0.91 |
| 0.15 | 0.75 | 1523.3 | 193.3 | 212.8 | 7.97 | 7.51 | 0.96 |
| 0.15 | 1.5 | 1524.2 | 246.4 | 209.7 | 6.58 | 7.38 | 1.21 |
| SEM |  | 73.54 | 18.50 | 22.63 | 0.64 | 0.75 | 0.09 |
| *P*-value |  | 0.62 | 0.77 | 0.95 | 0.44 | 0.29 | 0.86 |
| Contrast | FB0 vs FB0.75 and FB1.5 | | | | | | |
| *P*-value |  | 0.0003 | 0.64 | 0.20 | 0.03 | 0.007 | 0.006 |
| a-b Means with different letters within a column are significantly different (P < 0.05). | | | | | | | |
